# Supplementary material
Source: PubMed Central journal article supplement (PMC2921985)

# Supporting Information

## Spectroscopic and Mechanistic Investigations of Dehaloperoxidase B from *Amphitrite ornata*

Jennifer D'Antonio, Edward L. D'Antonio, Matthew K. Thompson, Edmond F. Bowden, Stefan Franzen, Tatyana Smirnova and Reza A. Ghiladi\*

<sup>‡</sup>Department of Chemistry, North Carolina State University, Raleigh, North Carolina, 27695-8204

Running Title: Spectroscopic and Mechanistic Investigations of Dehaloperoxidase B  
Address Correspondence to: Reza A. Ghiladi Department of Chemistry, North Carolina State University, Raleigh, NC 27695-8204, Tel. 919-513-0680; Fax. 919-515-5079; E-Mail: Reza\_Ghiladi@NCSU.edu

### Table of Contents

Figure SD1. UV-visible spectra of different heme states of DHP B (10  $\mu\text{M}$ ) at pH 7.0.

Figure SD2. UV-visible spectra of halophenol adducts of DHP B (8  $\mu\text{M}$ ) at pH 7.0. A) Monohalophenol adducts of 4-FP (8 mM), 4-CP (8 mM), 4-BP (8 mM), 4-IP (850  $\mu\text{M}$ ) and phenol (8 mM). B) Trihalophenol adducts of TFP (4 mM), TCP (0.3 or 2 mM), and TBP (255  $\mu\text{M}$ ).

Figure SD3. UV-visible spectroscopic monitoring of the oxidative dehalogenation of trihalophenols (150  $\mu\text{M}$ ) as catalyzed by DHP B (0.5  $\mu\text{M}$ ) in the presence of hydrogen peroxide at pH 7 and 25 °C. (A) Trifluorophenol, ferric DHP, (B) trichlorophenol, ferric DHP, (C) trichlorophenol, ferrous DHP, and (D) tribromophenol.

Figure SD4. Dependence of  $k_{\text{obs}}$  for the reaction between ferric DHP B (10  $\mu\text{M}$ ) with hydrogen peroxide (2.5 – 25 equivalents) at pH 7 yielding Compound ES. Note: experiments were performed in triplicate, with error bars smaller than the symbols used in the plot.

Figure SD5. (A) Stopped-flow UV-visible spectroscopic monitoring (900 scans, 85 sec) of the double-mixing reaction between preformed DHP B Compound ES (10  $\mu\text{M}$ ; 500 ms) and TCP (300  $\mu\text{M}$ ) at pH 7. See Materials and Methods for details. (B) Calculated UV-visible spectra for Compound ES (red), ferric DHP B regenerated upon product formation (green), and the ferric/oxyferrous DHP B mixture (purple) are shown; the rapid-scanning data from panel A were compiled and fitted to a two-step, three species sequential irreversible model using the Specfit global analysis program.

Figure SD6. DCQ product formation (A,  $\Delta\text{Abs}_{275}$ ) and TCP co-substrate loss (B,  $\Delta\text{Abs}_{312}$ ) for the reaction between preformed Compound ES (10  $\mu\text{M}$ ) with TCP (300  $\mu\text{M}$ ) at pH 7 and 25 °C. The aging time of the Compound ES intermediate was varied as indicated in the legend.

Figure SD7. (A) Stopped-flow UV-visible spectroscopic monitoring (900 scans, 85 sec) of the double-mixing reaction between ferric DHP B (10  $\mu\text{M}$ ) pre-incubated with TCP (300  $\mu\text{M}$ ) for 500 ms prior to its

reaction with a 10-fold excess of H<sub>2</sub>O<sub>2</sub> (*in situ* generated Compound ES) at pH 7. (B) Calculated UV-visible spectra for ferric DHP B incubated with TCP (black), ferric DHP B regenerated upon product formation (green), and the ferric/oxyferrous DHP B mixture (purple) are shown; the rapid-scanning data from panel A were compiled and fitted to a two-step, three species sequential irreversible model using the Specfit global analysis program.

Figure SD8. DCQ product formation (A,  $\Delta\text{Abs}_{275}$ ) and TCP co-substrate loss (B,  $\Delta\text{Abs}_{312}$ ) for the reaction between ferric DHP B (10  $\mu\text{M}$ ) pre-incubated with TCP (300  $\mu\text{M}$ ) followed by their reaction with 100  $\mu\text{M}$  H<sub>2</sub>O<sub>2</sub> (*in situ* generated Compound ES) at pH 7 and 25 °C. The pre-incubation period between ferric DHP B and TCP was varied as indicated in the legend.

Figure SD9. (A) Stopped-flow UV-visible spectroscopic monitoring (900 scans, 85 sec) of the double-mixing reaction between ferric DHP B (10  $\mu\text{M}$ ) pre-incubated with a 7-fold molar excess of DCQ for 500 ms prior to its reaction with a 2.5-fold excess of H<sub>2</sub>O<sub>2</sub> (*in situ* generated Compound ES) at pH 7. (B) UV-visible spectra observed for ferric DHP B incubated with DCQ (black, 2 ms), Compound ES (dark grey, 4 s), and the ferric/oxyferrous DHP B mixture (light grey, 85 s) are shown.

Figure SD10. (A) Stopped-flow UV-visible spectroscopic monitoring (900 scans, 85 sec) of the reaction between ferric DHP B (10  $\mu\text{M}$ ) and a 7-fold excess of DCQ at pH 7. (B) Calculated UV-visible spectra for ferric (black) and the ferric/oxyferrous DHP B mixture (purple) are shown; the rapid-scanning data from panel A were compiled and fitted to a one-step, two species irreversible model using the Specfit global analysis program.

Figure SD11. (A) UV-visible spectrum of Compound RH formed from the reaction of ferric DHP B and a 10-fold excess of hydrogen peroxide at pH 7. (B) Reduction of Compound RH upon addition of excess sodium dithionite. (C) After desalting via gel filtration, UV-visible spectrum of Compound P<sub>426</sub> at pH 7.0.

Figure SD12. (A) UV-visible spectrum of Compound RH formed from the reaction of ferric DHP B and a 2.5-fold excess of hydrogen peroxide at pH 7. (B) Reduction of Compound RH upon addition of excess sodium dithionite. (C) After desalting via gel filtration, UV-visible spectrum of oxyferrous DHP B at pH 7.0.

Figure SD1. UV-visible spectra of different heme states of DHP B (10  $\mu\text{M}$ ) at pH 7.0.

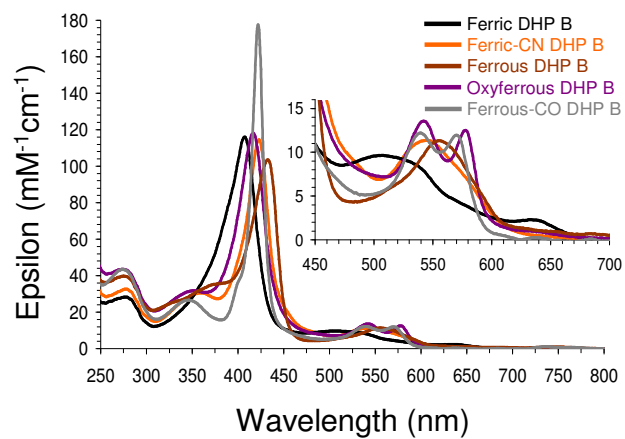

Figure SD2. UV-visible spectra of halophenol adducts of DHP B ( $8 \mu\text{M}$ ) at pH 7.0. A) Monohalophenol adducts of 4-FP (8 mM), 4-CP (8 mM), 4-BP (8 mM), 4-IP (850  $\mu\text{M}$ ) and phenol (8 mM). B) Trihalophenol adducts of TFP (4 mM), TCP (0.3 or 2 mM), and TBP (255  $\mu\text{M}$ ).

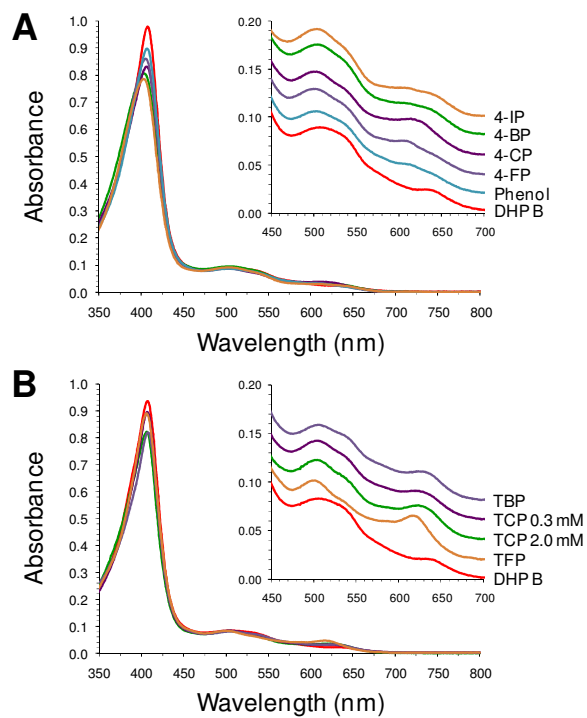

Figure SD3. UV-visible spectroscopic monitoring of the oxidative dehalogenation of trihalophenols (150  $\mu\text{M}$ ) as catalyzed by DHP B (0.5  $\mu\text{M}$ ) in the presence of hydrogen peroxide at pH 7 and 25  $^{\circ}\text{C}$ . (A) Trifluorophenol, ferric DHP, (B) trichlorophenol, ferric DHP, (C) trichlorophenol, ferrous DHP, and (D) tribromophenol.

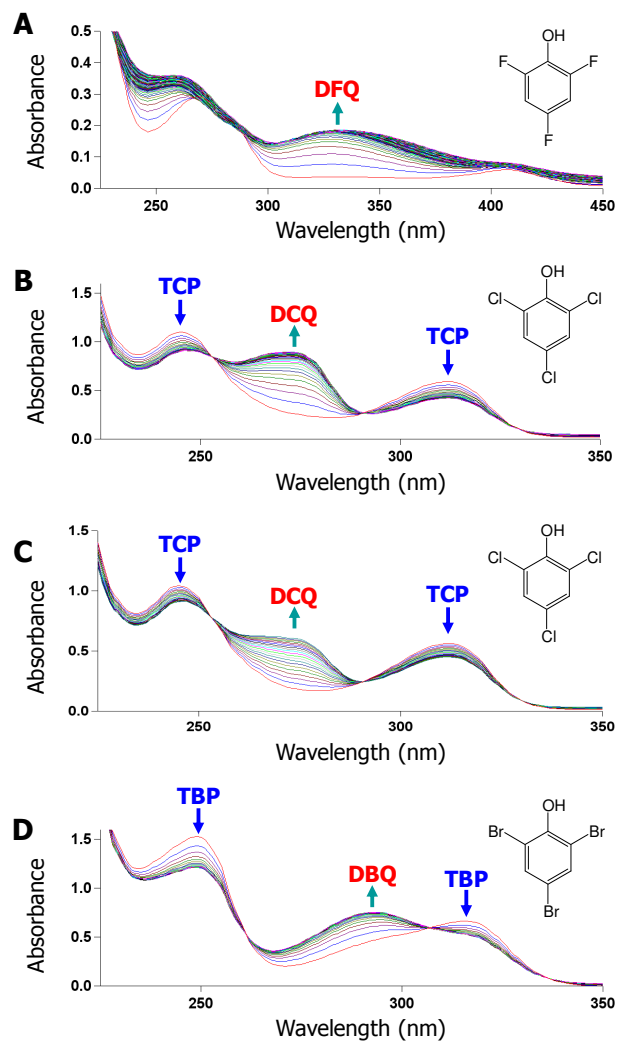

Figure SD4. Dependence of  $k_{\text{obs}}$  for the reaction between ferric DHP B (10  $\mu\text{M}$ ) with hydrogen peroxide (2.5 – 25 equivalents) at pH 7 yielding Compound ES. Note: experiments were performed in triplicate, with error bars smaller than the symbols used in the plot.

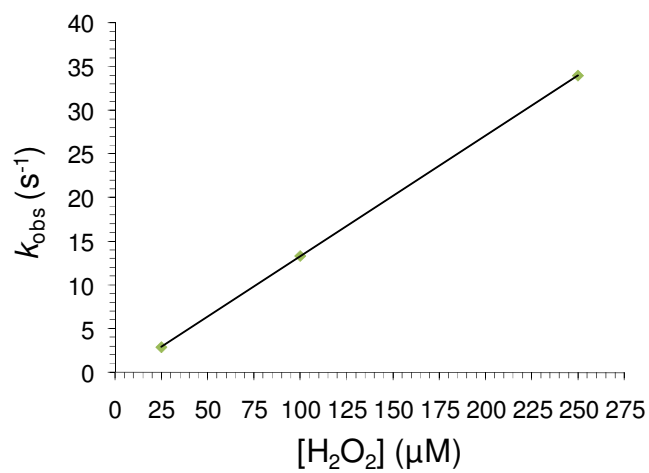

Figure SD5. (A) Stopped-flow UV-visible spectroscopic monitoring (900 scans, 85 sec) of the double-mixing reaction between preformed DHP B Compound ES (10  $\mu\text{M}$ ; 500 ms) and TCP (300  $\mu\text{M}$ ) at pH 7. See Materials and Methods for details. (B) Calculated UV-visible spectra for Compound ES (red), ferric DHP B regenerated upon product formation (green), and the ferric/oxyferrous DHP B mixture (purple) are shown; the rapid-scanning data from panel A were compiled and fitted to a two-step, three species sequential irreversible model using the Specfit global analysis program.

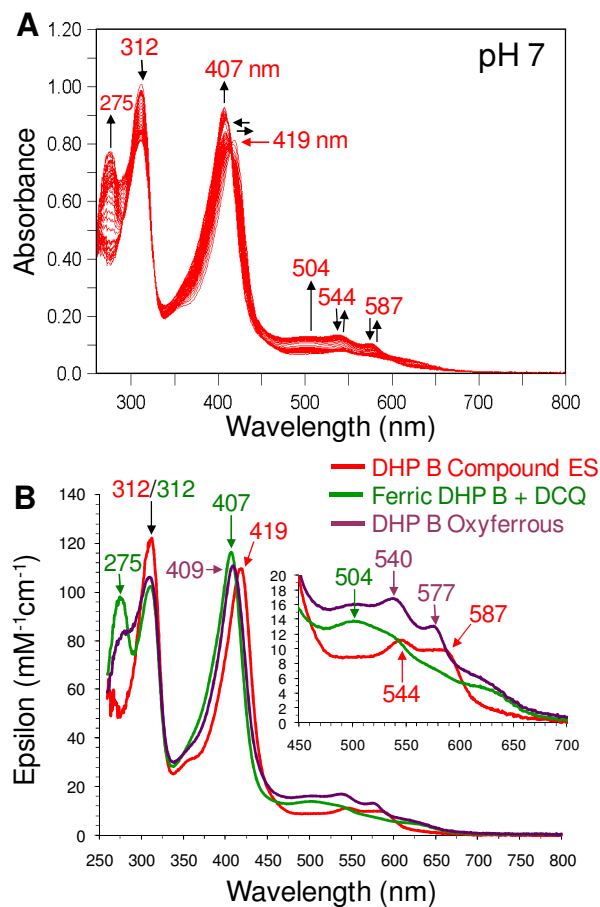

Figure SD6. DCQ product formation (A,  $\Delta\text{Abs}_{275}$ ) and TCP co-substrate loss (B,  $\Delta\text{Abs}_{312}$ ) for the reaction between preformed Compound ES (10  $\mu\text{M}$ ) with TCP (300  $\mu\text{M}$ ) at pH 7 and 25  $^{\circ}\text{C}$ . The aging time of the Compound ES intermediate was varied as indicated in the legend.

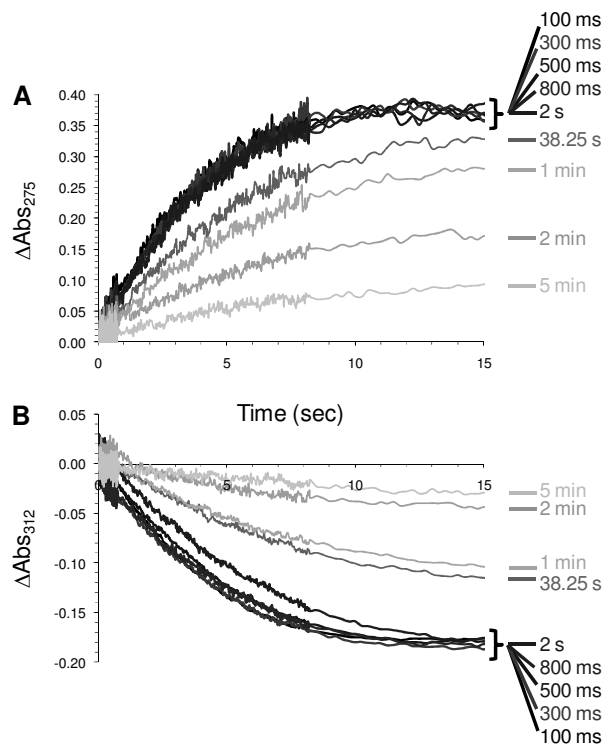



Figure SD7. (A) Stopped-flow UV-visible spectroscopic monitoring (900 scans, 85 sec) of the double-mixing reaction between ferric DHP B (10  $\mu$ M) pre-incubated with TCP (300  $\mu$ M) for 500 ms prior to its reaction with a 10-fold excess of H<sub>2</sub>O<sub>2</sub> (*in situ* generated Compound ES) at pH 7. (B) Calculated UV-visible spectra for ferric DHP B incubated with TCP (black), ferric DHP B regenerated upon product formation (green), and the ferric/oxyferrous DHP B mixture (purple) are shown; the rapid-scanning data from panel A were compiled and fitted to a two-step, three species sequential irreversible model using the Specfit global analysis program.

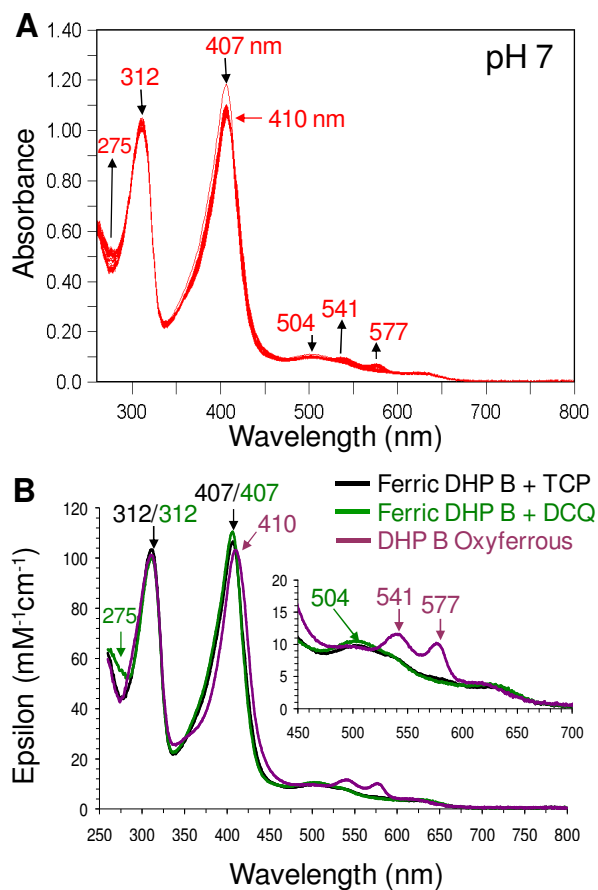

Figure SD8. DCQ product formation (A,  $\Delta\text{Abs}_{275}$ ) and TCP co-substrate loss (B,  $\Delta\text{Abs}_{312}$ ) for the reaction between ferric DHP B (10  $\mu\text{M}$ ) pre-incubated with TCP (300  $\mu\text{M}$ ) followed by their reaction with 100 mM  $\text{H}_2\text{O}_2$  (*in situ* generated Compound ES) at pH 7 and 25  $^\circ\text{C}$ . The pre-incubation period between ferric DHP B and TCP was varied as indicated in the legend.

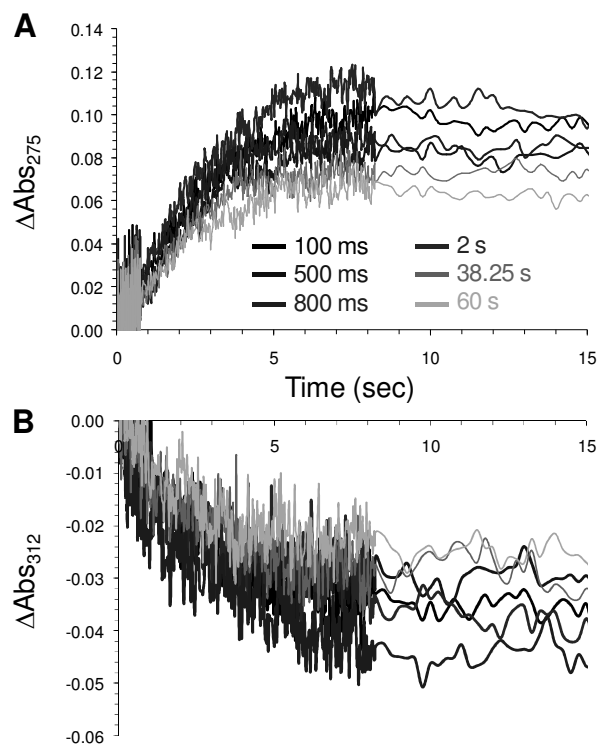

Figure SD9. (A) Stopped-flow UV-visible spectroscopic monitoring (900 scans, 85 sec) of the double-mixing reaction between ferric DHP B (10  $\mu$ M) pre-incubated with a 7-fold molar excess of DCQ for 500 ms prior to its reaction with a 2.5-fold excess of H<sub>2</sub>O<sub>2</sub> (*in situ* generated Compound ES) at pH 7. (B) UV-visible spectra observed for ferric DHP B incubated with DCQ (black, 2 ms), Compound ES (dark grey, 4 s), and the ferric/oxyferrous DHP B mixture (light grey, 85 s) are shown.

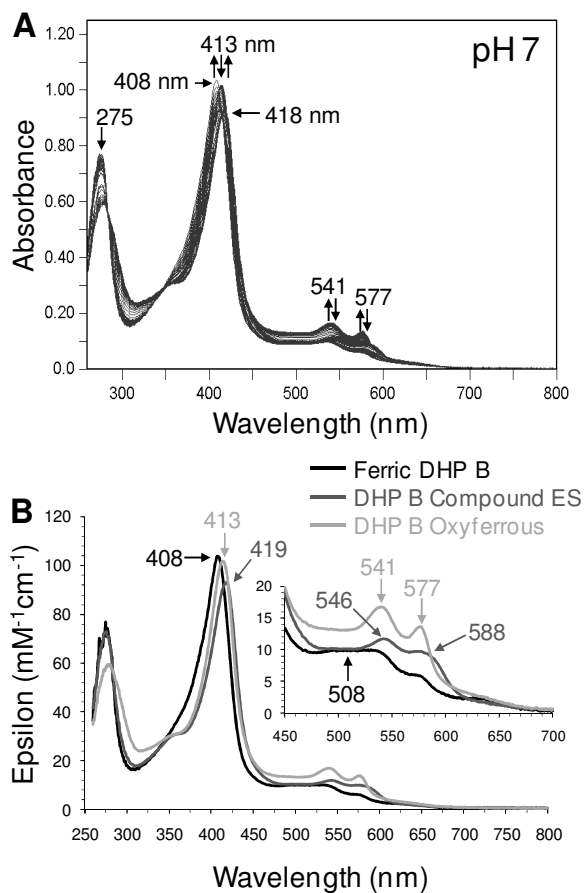

Figure SD10. (A) Stopped-flow UV-visible spectroscopic monitoring (900 scans, 85 sec) of the reaction between ferric DHP B (10  $\mu\text{M}$ ) and a 7-fold excess of DCQ at pH 7. (B) Calculated UV-visible spectra for ferric (black) and the ferric/oxyferrous DHP B mixture (purple) are shown; the rapid-scanning data from panel A were compiled and fitted to a one-step, two species irreversible model using the Specfit global analysis program.

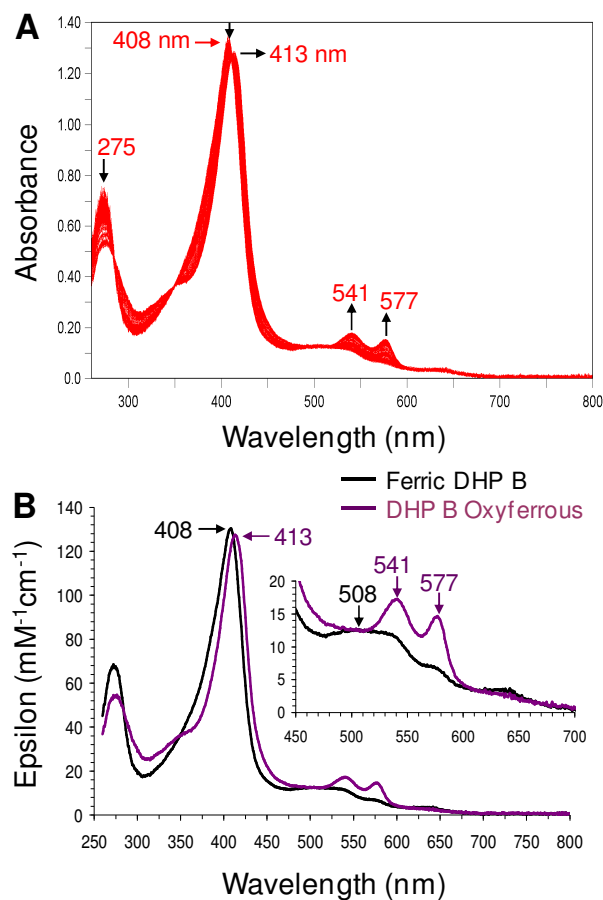

Figure SD11. (A) UV-visible spectrum of Compound RH formed from the reaction of ferric DHP B and a 10-fold excess of hydrogen peroxide at pH 7. (B) Reduction of Compound RH upon addition of excess sodium dithionite. (C) After desalting via gel filtration, UV-visible spectrum of Compound P<sub>426</sub> at pH 7.0.

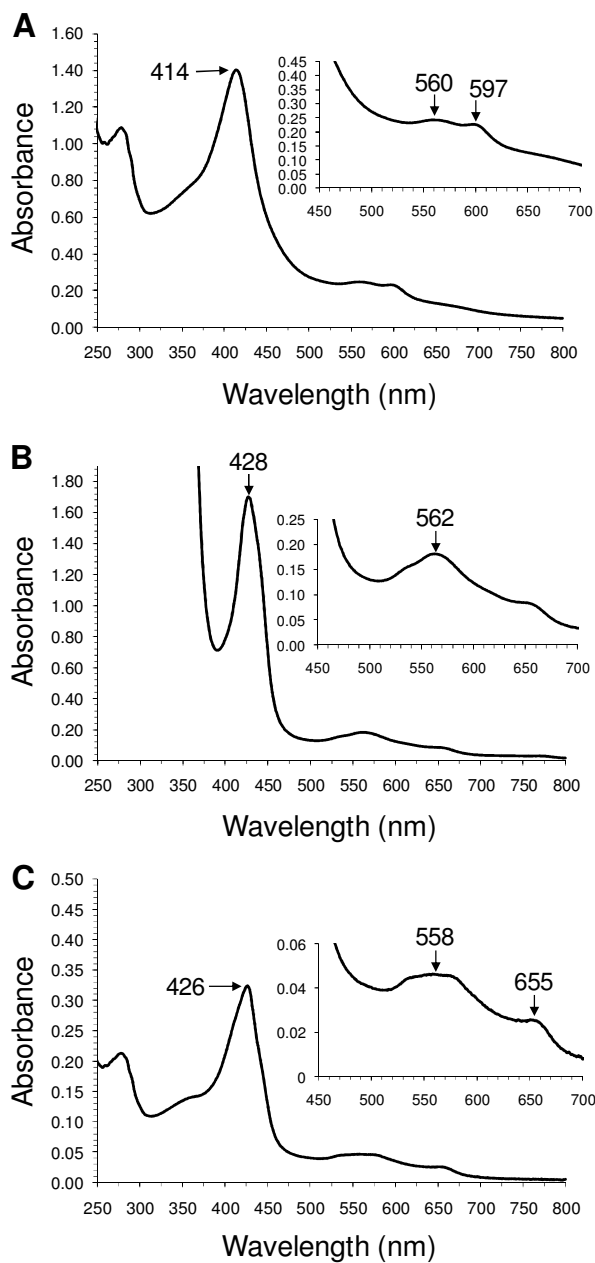

Figure SD12. (A) UV-visible spectrum of Compound RH formed from the reaction of ferric DHP B and a 2.5-fold excess of hydrogen peroxide at pH 7. (B) Reduction of Compound RH upon addition of excess sodium dithionite. (C) After desalting via gel filtration, UV-visible spectrum of oxyferrous DHP B at pH 7.0.

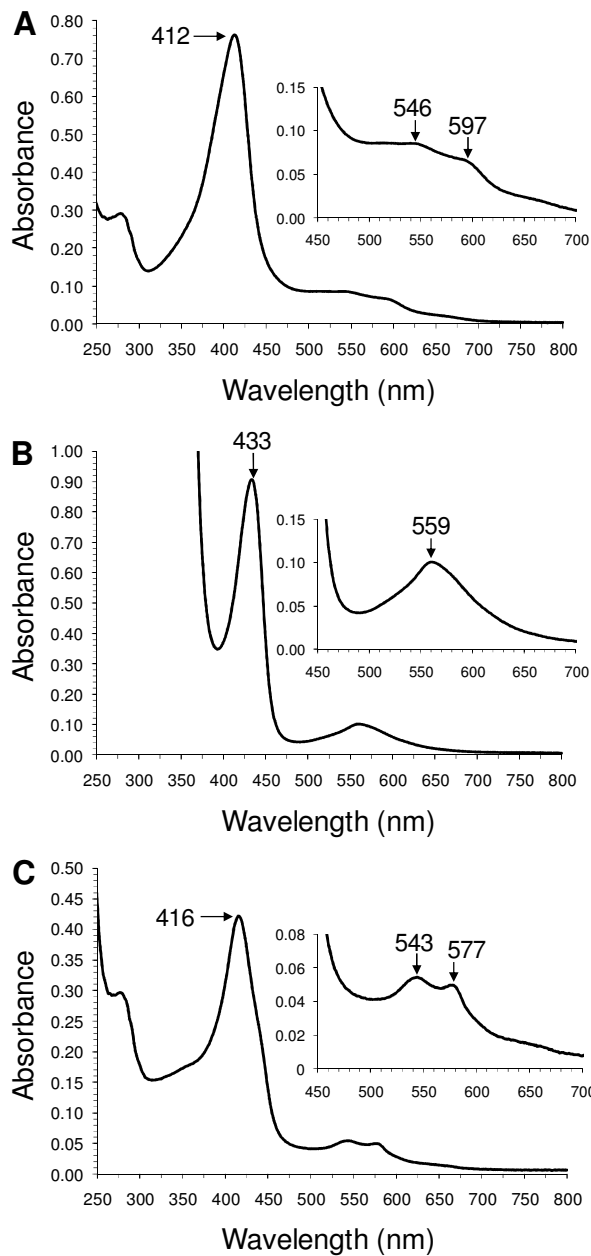

Supplement: NIHMS222280-supplement-1_si_001.pdf [file NIHMS222280-supplement-1_si_001.pdf]
